# Supplementary material for: Friends with Benefits: An Inside Look of Periodontal Microbes’ Interactions Using Fluorescence In Situ Hybridization—Scoping Review
Source: MDPI journal article supplement (doi:10.3390/microorganisms9071504), 2021-07-14
Supplement: s1 [file s1]

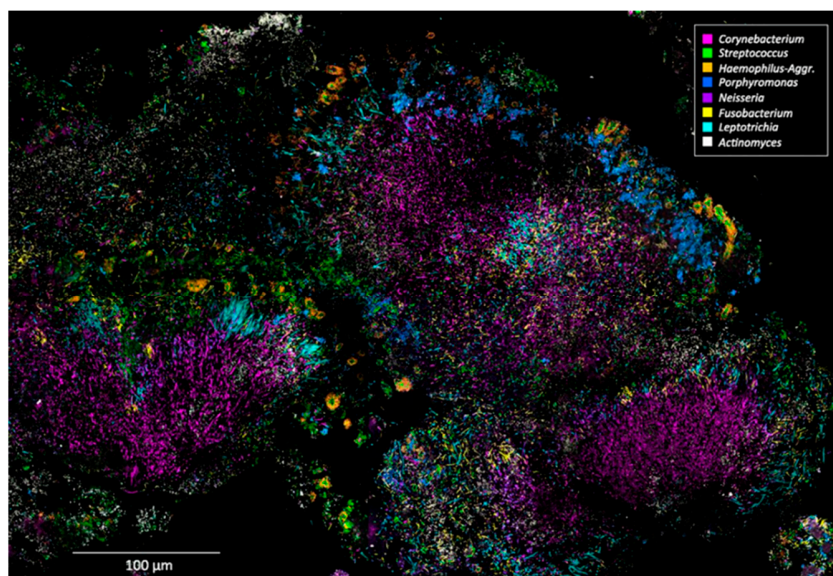

**Figure S1.** Multiple hedgehogs' structures adjacent to each other. Reprinted with the publisher's permission.

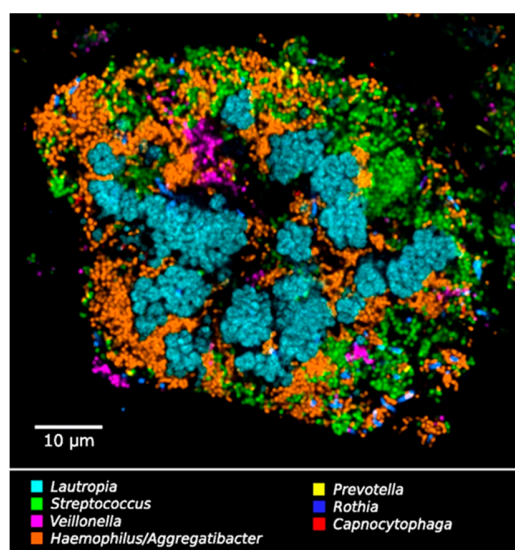

**Figure S2.** A cauliflower structure in plaque. Reprinted with the publisher's permission.

**Table S1.** Database search strategy.

| Database                                                                 | Search strategy                                                                                                                                                                                                                 |
|--------------------------------------------------------------------------|---------------------------------------------------------------------------------------------------------------------------------------------------------------------------------------------------------------------------------|
| <b>MEDLINE (via PubMed)</b>                                              | (Periodont* OR "Periodontal pockets" OR Microbes OR "Oral biofilm" OR Micro* OR "Oral micro*" OR "Bacteria") AND (Imaging OR FISH OR "FISH technique" OR "fluorescence <i>in situ</i> hybridization" OR "hybridization")        |
| <b>Scopus (Elsevier: Amsterdam, The Netherlands)</b>                     | (Periodont* OR "Periodontal pockets" OR Microbes OR "Oral biofilm" OR Micro* OR "Oral micro*" OR "Bacteria") AND (Imaging OR FISH OR "FISH technique" OR "fluorescence <i>in situ</i> hybridization" OR "hybridization")        |
| <b>Web of Science (Clarivate Analytics: Philadelphia, United States)</b> | TS = ((Periodont* OR "Periodontal pockets" OR Microbes OR "Oral biofilm" OR Micro* OR "Oral micro*" OR "Bacteria") AND (Imaging OR FISH OR "FISH technique" OR "fluorescence <i>in situ</i> hybridization" OR "hybridization")) |

**Table S2.** Oligonucleotide probes' names and sequences, the microorganisms targeted, and the FISH conditions used in the studies included in this scoping review. The abbreviations can be found at the bottom of the table.

| Authors (year)                               | Probe name | Sequence (5'→3')              | Taxon | Target                                                         | FISH conditions   |                          |                            |
|----------------------------------------------|------------|-------------------------------|-------|----------------------------------------------------------------|-------------------|--------------------------|----------------------------|
|                                              |            |                               |       | Microorganisms                                                 | % Form. (vol/vol) | Hybridization Temp. (°C) | Hybridization Time (hours) |
| <b>Moter, A., et al. (1998)</b>              | EUB338     | GCTGCCTCC<br>CGTAGGAGT        | D     | <i>Bacteria</i>                                                | 0-20              | 46                       | 1-3                        |
|                                              | TRE I      | ACGCAAGCTC<br>ATCCTCAAG       | G     | Group I of oral treponemes                                     |                   |                          |                            |
| <b>Wecke, J., et al. (2000)</b>              | EUB338     | GCTGCCTC<br>CCGTAGGAGT        | D     | <i>Bacteria</i>                                                | 20                | 46                       | 3.5                        |
|                                              | TRE I      | ACGCAAGC<br>TCATCCTCAAG       | G     | Group I of oral treponemes                                     |                   |                          |                            |
| <b>Lepp, P. W., et al. (2004)</b>            | SBGA-1     | NAI                           | S     | <i>Methanobrevibacter oralis</i>                               | 0-80              | 65                       | 8                          |
| <b>Gmür, R., et al. (2004)</b>               | Lbuc668    | TACTCGTGC<br>AGTTCCGTCC       | S     | <i>Leptotrichia buccalis</i><br><i>Fusobacterium nucleatum</i> | 30-40             | 46                       | 2.5                        |
| <b>Gmür, R. and H. Lüthi-Schaller (2007)</b> | EUB338     | GCTGCCTC<br>CCGTAGGAGT        | D     | <i>Bacteria</i>                                                | 40                | 46                       | 2                          |
|                                              | Tfor582    | GCGGACTTA<br>ACAGCCACCT       | S     | <i>Tannerella forsythia</i>                                    |                   |                          |                            |
| <b>Drescher, J., et al. (2010)</b>           | EUB338     | GCTGCCTC<br>CCGTAGGAGT        | D     | <i>Bacteria</i>                                                | 0-30              | 46                       | 3-5                        |
|                                              | SELE       | TCGGAATGTT<br>GTCCCCATCC      | G     | <i>Selenomonas sp.</i><br><i>Centipeda sp.</i>                 |                   |                          |                            |
|                                              | FUSO       | CTAATGGGA<br>CGCAAAGCT<br>CTC |       | <i>Fusobacterium sp.</i>                                       |                   |                          |                            |
| <b>Schlafer, S., et al. (2010)</b>           | EUB338     | GCTGCCTC<br>CCGTAGGAGT        | D     | <i>Bacteria</i>                                                | 0-30              | 46                       | 3-5                        |
|                                              | FIAL       | TCTTTGTCCAC<br>TATCGTTTGA     | S     | <i>Filifactor alocis</i>                                       |                   |                          |                            |
|                                              | EUB338     | GCT GCC TCC<br>CGT AGG AGT    | D     | <i>Bacteria</i>                                                | 0-50              | 50                       | 3                          |

| Authors<br>(year)               | Probe name  | Sequence<br>(5'→3')                             | Taxo<br>n | Target                                                                                | FISH conditions      |                                 |                                   |
|---------------------------------|-------------|-------------------------------------------------|-----------|---------------------------------------------------------------------------------------|----------------------|---------------------------------|-----------------------------------|
|                                 |             |                                                 |           | Microorganisms                                                                        | % Form.<br>(vol/vol) | Hybridizatio<br>n Temp.<br>(°C) | Hybridizatio<br>n<br>Time (hours) |
| Zjinge,<br>V., et al.<br>(2010) | EUK502      | ACC AGA CTT<br>GCC CTC C                        |           | <i>Eukarya</i>                                                                        | 15-45                |                                 |                                   |
|                                 | CAAL        | GCC AAG GCT<br>TAT ACT CGC T                    | S         | <i>Candida albicans</i>                                                               | 30                   |                                 |                                   |
|                                 | STR493      | GTT AGC CGT<br>CCC TTT CTG G                    | G         | most <i>Streptococcus</i><br>sp. and some<br><i>Lactococcus</i> sp.                   | 0                    |                                 |                                   |
|                                 | LAB759      | CTA CCC ATR<br>CTT TCG AGC C                    |           | <i>Lactobacillus</i> sp.,<br><i>Ruminococcaceae</i> sp.<br>and <i>Pediococcus</i> sp. | 35                   | 46                              |                                   |
|                                 | Mmicros1435 | GCC GCC GAT<br>CTA ACC GCA                      | S         | <i>Parvimonas micra</i>                                                               | 0                    | 50                              |                                   |
|                                 | Sel1469     | CCA GTC ACC<br>TTC CCC ACC                      | G         | <i>Selenomonas</i> sp. but<br>not <i>S. sputigena</i>                                 | 30-50                | 46                              |                                   |
|                                 | SynA1409    | ACA CCC GGC<br>TCG GGT GGT                      |           | <i>Synergistetes</i> group A                                                          | 40-50                |                                 |                                   |
|                                 | ACT218      | CGA GCC CAT<br>CCC CCA CCA                      |           | <i>Actinomyces</i> sp.                                                                | 0                    | 50                              |                                   |
|                                 | Fus664      | CTT GTA GTT<br>CCG CYT ACC TC                   |           | most <i>Fusobacterium</i><br>sp.                                                      | 40                   |                                 |                                   |
|                                 | Fnav1254    | CTT CAC AGC<br>TTT GCG ACT C                    | S         | <i>F. naviforme</i> , <i>F.</i><br><i>nucleatum</i> subsp.<br><i>fusiforme</i>        | 30                   | 46                              |                                   |
|                                 | Fnuc133c    | GTT GTC CCT<br>ANC TGT GAG<br>GC                |           | <i>F. nucleatum</i> , <i>F.</i><br><i>periodonticum</i>                               |                      |                                 |                                   |
|                                 | SPIRO1400   | CTC GGA TGG<br>TGT GAC GGG<br>CG                | F         | subgroup of the<br><i>Spirochaetaceae</i>                                             | ND                   | 50                              |                                   |
|                                 | TrepG1      | GAT TCC ACC<br>CCT ACA CTT                      | S         | <i>T. medium</i> and <i>T.</i><br><i>denticola</i>                                    | 20-50                | 46                              |                                   |
|                                 | Td469       | CAT GAC TAC<br>CGT CAT CAA<br>AGA AGC           |           | <i>T. denticola</i>                                                                   | ND                   | 50                              |                                   |
|                                 | Aa829       | GGG CTA AAC<br>CCC AAT CCC                      |           | <i>A.</i><br><i>actinomycetemcomitan</i><br><i>s</i>                                  |                      |                                 |                                   |
|                                 | Camp655     | CAT CTG CCT<br>CTC CCT YAC                      |           | <i>Campylobacter</i> sp.                                                              | 30                   | 46                              |                                   |
|                                 | CFB935      | CCA CAT GTT<br>CCT CCG CTT GT                   | G         | <i>Cytophaga</i> -<br><i>Flavobacterium</i> -<br><i>Bacteroides</i> cluster           | >40                  | 50                              |                                   |
|                                 | BAC303      | CCA ATG TGG<br>GGG ACC TT                       | F         | <i>Bacteroidaceae</i> and<br><i>Prevotellaceae</i>                                    | 0                    |                                 |                                   |
|                                 | Prev394     | GCA CGC TAC<br>TTG GCT GG                       | G         | <i>Prevotella</i> sp.                                                                 | 25                   |                                 |                                   |
|                                 | Pi425       | CTT TAC TCC<br>CCA ACA AAA<br>GCA GTT TAC<br>AA | S         | <i>P. intermedia</i>                                                                  | 20                   | 46                              |                                   |
|                                 | Pnig657     | TCC GCC TGC<br>GCT GCG TGT A                    |           | <i>P. nigrescens</i>                                                                  | ≤ 40                 |                                 |                                   |

| Authors<br>(year)                                   | Probe name | Sequence<br>(5'→3')                   | Taxo<br>n | Target                                 | FISH conditions          |                                 |                                   |
|-----------------------------------------------------|------------|---------------------------------------|-----------|----------------------------------------|--------------------------|---------------------------------|-----------------------------------|
|                                                     |            |                                       |           | Microorganisms                         | % Form.<br>(vol/vol<br>) | Hybridizatio<br>n Temp.<br>(°C) | Hybridizatio<br>n<br>Time (hours) |
|                                                     | Tfor582    | GCG GAC TTA<br>ACA GCC CAC<br>CT      |           | <i>T. forsythia</i>                    | 40                       |                                 |                                   |
|                                                     | Tfor440    | CGT ATC TCA<br>TTT TAT TCC<br>CCT GTA |           | <i>T. forsythia</i>                    | 20                       |                                 |                                   |
|                                                     | Tfor127    | CTC TGT TGC<br>GGG CAG GTT<br>AC      |           | <i>T. forsythia</i>                    | 40                       |                                 |                                   |
|                                                     | Tfor997    | TCA CTC TCC<br>GTC GTC TAC            |           | <i>T. forsythia</i>                    | 40                       |                                 |                                   |
|                                                     | Pg477      | CAA TAC TCG<br>TAT CGC CCG<br>TTA TTC |           | <i>P. gingivalis</i>                   | 20                       |                                 |                                   |
|                                                     | Pendo740   | CAG TGT CAG<br>ACG GAG CCT            |           | <i>P. endodontalis</i>                 | 30-40                    |                                 |                                   |
|                                                     | Capno371   | TCA GTC TTC<br>CGA CCA TTG            | G         | <i>Capnocytophaga</i>                  | 0                        | 50                              |                                   |
| <b>Machado<br/>, F. C., et<br/>al. (2012)</b>       | Pint649    | GCCGCCRC<br>TGAASTCAAGCC              | S         | <i>Prevotella intermedia</i>           | 40                       | 42                              | left overnight                    |
| <b>Mark<br/>Welch, J.<br/>L., et al.<br/>(2016)</b> | EUB338     | GCTGCCTC<br>CCGTAGGAGT                | D         | <i>Bacteria</i>                        | 20                       | 46                              | 2-4                               |
|                                                     | Act381     | CGTCGCTG<br>CATCAGGCTT                | P         | <i>Actinobacteria</i>                  |                          |                                 |                                   |
|                                                     | Act692     | CTGATATCT<br>GCGCATTCC                |           | <i>Actinobacteria</i>                  |                          |                                 |                                   |
|                                                     | Act476     | ATCCAGCTA<br>CCGTCAACC                |           | <i>Actinomyces</i>                     |                          |                                 |                                   |
|                                                     | Cor595     | CCGGAATT<br>CACAGACGACG               | G         | <i>Corynebacterium</i>                 |                          |                                 |                                   |
|                                                     | Cor633     | AGTTATGCC<br>CGTATCGCCTG              |           | <i>Corynebacterium</i>                 |                          |                                 |                                   |
|                                                     | Rot491     | TAGCCGGC<br>GCTTCTCTG                 |           | <i>Rothia</i>                          |                          |                                 |                                   |
|                                                     | Cmat175    | ACTAAACCA<br>TGGTCCTATCCG             | S         | <i>Corynebacterium<br/>matruchotii</i> |                          |                                 |                                   |
|                                                     | Cap371     | TCAGTCTC<br>CGACCATG                  |           | <i>Capnocytophaga</i>                  |                          |                                 |                                   |
|                                                     | Prv392     | GCACGCTAC<br>TTGGCTGG                 |           | <i>Prevotella</i>                      |                          |                                 |                                   |
|                                                     | Pg1160     | CCTCACGCC<br>TTACGACGG                | G         | <i>Porphyromonas</i>                   |                          |                                 |                                   |
|                                                     | Str405     | TAGCCGTC<br>CCTTCTGGT                 |           | <i>Streptococcus</i>                   |                          |                                 |                                   |
|                                                     | Vei488     | CCGTGGCT<br>TTCTATTCCG                |           | <i>Veillonella</i>                     |                          |                                 |                                   |
|                                                     | Lmir444    | TGGCACAG<br>TCCTTTTCGTTCC             | S         | <i>Lautropia mirabilis</i>             |                          |                                 |                                   |
|                                                     | Nei1030    | CCTGTGTTA<br>CGGCTCCCG                | F         | <i>Neisseriaceae</i>                   |                          |                                 |                                   |

| Authors<br>(year) | Probe name | Sequence<br>(5'→3')    | Taxon | Target                 | FISH conditions      |                             |                            |
|-------------------|------------|------------------------|-------|------------------------|----------------------|-----------------------------|----------------------------|
|                   |            |                        |       | Microorganisms         | % Form.<br>(vol/vol) | Hybridization Temp.<br>(°C) | Hybridization Time (hours) |
|                   | Pas111     | TCCCAAGC<br>ATTACTCACC | G     | <i>Pasteurellaceae</i> |                      |                             |                            |
|                   | Fus714     | GGCTTCCC<br>CATCGGCATT |       | <i>Fusobacterium</i>   |                      |                             |                            |
|                   | Lep568     | GCCTAGAT<br>GCCCTTTATG |       | <i>Leptotrichia</i>    |                      |                             |                            |

D: Domain; F: Family; G: Genus; NAI: no available information; ND: not determined; P: Phylum; S: Specie.
